# Supplementary material
Source: Springer Nature journal article supplement (https://www.springermedizin.de/resource/supplementary/12968_2012_2643_MOESM3_ESM.pdf/9582390)

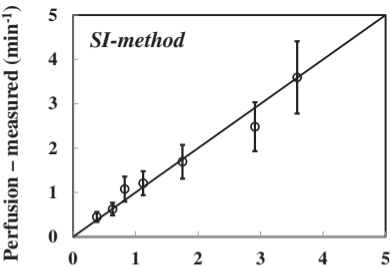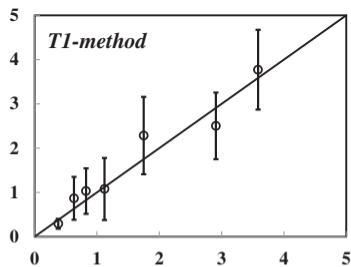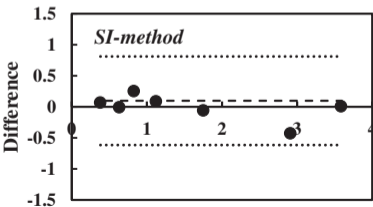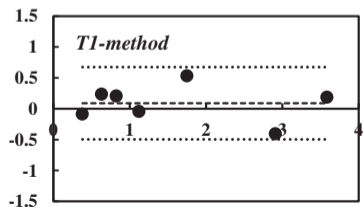

Perfusion - executed ( $\text{ml/min}/\text{ml}$ )

Supplement: MOESM3 [file 9582390]
